# Supplementary material for: Interbirth interval and history of previous preeclampsia: a case–control study among multiparous women
Source: PubMed Central journal article supplement (PMC3877952; doi:10.1186/1471-2393-13-244), 2013-12-27
Supplement: 1471-2393-13-244-S1.pdf [file 1471-2393-13-244-S1.pdf]

## QUESTIONNAIRE

Date of the interview: \_\_\_\_/\_\_\_\_/\_\_\_\_  
(Day) (Month) (Year)

Status: 1. Case  
0. Control

1. Maternity Home \_\_\_\_\_

2. ID \_\_\_\_\_

3. 3.Date of birth \_\_\_\_/\_\_\_\_/\_\_\_\_  
(Day) (Month)(Year)

4. Indicate the highest level of education that you have completed.

1. School (less than 10 years)
2. School (10 years)
3. Professional technical education (10-13 years)
4. Institute/University
5. Postgraduate

5. Have you been told by a physician that you had or have each condition below? (Check *all* that apply)

| Disease                   | Yes | No |
|---------------------------|-----|----|
| a. Diabetes               |     |    |
| b. Gestational Diabetes   |     |    |
| c. Renal (kidney) disease |     |    |

6. What was your birth weight? \_\_\_\_\_ g 88. Don't know

7. What is your blood group, \_\_\_\_\_ 88. Don't know  
And RH \_\_\_\_\_ 88. Don't know

Now I am going to ask questions about the pregnancy that ended ..... \_\_\_\_/\_\_\_\_/\_\_\_\_  
(Day) (Month)(Year)

8. What was your marital status during that pregnancy?

1. single
2. married
3. widowed
4. divorced
5. Refused to respond

9. How much did you weight before that pregnancy? \_\_\_\_\_ kg 88. Don't know

10. How tall are you? \_\_\_\_\_ cm 88. Don't know

11. What was the total number of people (including yourself and children under 18) living in your household during that pregnancy? \_\_\_\_\_

12. How many members of your household (including yourself) were employed during that pregnancy? \_\_\_\_\_

13. How would you rate your family's general standard of living during that pregnancy?

1. Substantially below average
2. Little below average
3. Average
4. Little above average
5. Substantially above average
88. Not sure/difficult to answer

14. During that pregnancy, the approximate amount of household income spent by all of your household members per month was

1. Less than 25,000 drams
2. From 25,000 – 50,000 drams
3. From 51,000 – 100,000 drams
4. From 101,000 – 250,000 drams
5. Above 250,000drams
99. Don't know

15. Please tell me whether your household or any member of it had the following working items during that pregnancy

| Item                                | Yes | No |
|-------------------------------------|-----|----|
| a. Individual heating system (Baxi) |     |    |
| b. DVD player                       |     |    |
| c. Automobile                       |     |    |
| d. Automatic washing machine        |     |    |
| e. Personal computer                |     |    |
| f. Satellite                        |     |    |
| g. Cell phone                       |     |    |
| h. Vacation home/villa              |     |    |

17. Were you employed during that pregnancy?

1. Yes
2. No (*Go to the Q.21*)
3. I was a student

18. What were your working hours?

1. <4 hours
2. 4-8 hours
3. >8 hours
4. Other a. *specify* \_\_\_\_\_

**19. How had your work (studying) situation changed during pregnancy?**

1. It did not change (*Go to the Q.21*)
2. I had stopped working (studying)
3. I had reduced my working (studying) hours
4. Other \_\_\_\_\_ a. *specify*

**20. In which week of your pregnancy had your work (studying) situation changed?**

\_\_\_\_\_ weeks of pregnancy

**21. How many babies were born during that birth? \_\_\_\_\_**

**22. What was that baby's gender, weight, height at birth?**

a. \_\_\_ kg 88. Don't know b. \_\_\_ cm 88. Don't know c. gender 1. boy 2. girl 88. Don't know

a. \_\_\_ kg 88. Don't know b. \_\_\_ cm 88. Don't know c. gender 1. boy 2. girl 88. Don't know

**23. Have you/your partner at any time during one year before that pregnancy used the following methods to avoid becoming pregnant?**

1. Condom
2. Diaphragm
3. IUD
4. Hormone injection
5. Oral contraceptives
6. Spermicides (foam, suppositories, cream)
7. Safe period
8. Withdrawal
9. Abstinence
10. Lactation Amenorrhea Method (breast feeding)
11. No such methods
12. Other (specify) \_\_\_\_\_

**23. Was this pregnancy planned?**

1. Planned
2. Partly planned
3. Not planned (*Go to the Q.25*)
4. Don't know
5. Do not wish to answer

**24. How long did you try to become pregnant before you succeeded?**

1. became pregnant right away
2. 1-2 months
3. 3-5 months
4. 6-12 months
5. More than 12 months
88. Don't know
99. Do not wish to answer

**25. Did you take folic acid (vitamin B6) before/during that pregnancy?**

1. Yes \_\_\_ weeks before to \_\_\_ weeks of that pregnancy
2. Yes from \_\_\_ weeks to \_\_\_ weeks of that pregnancy
3. No
88. Don't know

**26. Did you receive treatment from a doctor, nurse, or other health care worker to help you get pregnant with your new baby?** (This may include infertility treatments such as fertility-enhancing drugs or assisted reproductive technology.)

1. Yes
2. No (*Go to the Q.28*)

**27. Did you use any of the following treatments during the month you got pregnant with your new baby?** Check all that apply

1. Fertility-enhancing drugs prescribed by a doctor
2. Artificial insemination or intrauterine insemination
3. Other medical treatment a. specify \_\_\_\_\_

**28. Had the midwife or doctor told you that you have or have had high blood pressure during that pregnancy?**

1. Yes a. specify the highest reading during that pregnancy \_\_\_\_\_ / \_\_\_\_\_ 99. Don't know  
b. specify the time of onset \_\_\_ weeks or \_\_\_ month 99. Don't know
2. No
99. Don't know

**29. Have you had high blood pressure without being pregnant?**

1. Yes a. specify the highest reading before this pregnancy \_\_\_\_\_ / \_\_\_\_\_ 99. Don't know
2. No
99. Don't know

**30. Have you ever smoked cigarettes?**

1. Yes
2. No (*Go to Q.33*)

**31. Did you smoke during that pregnancy?** (*Go to Q.33*)

1. Sometimes \_\_\_\_\_ cigarettes per week (*Go to Q.33*)
2. Daily \_\_\_\_\_ cigarettes per day (*Go to Q.33*)
3. I stopped smoking at \_\_\_ weeks of that pregnancy (*Go to Q.33*)
4. No

**32. When did you stop smoking?**

1. \_\_\_\_\_ months before that pregnancy
2. I did not smoke before that pregnancy

**33. How many cigarette smokers, not including yourself, were living in your home during that pregnancy? \_\_\_\_**

**34. During that pregnancy, about how many hours a day, on average, were you in the same room with another person who was smoking? \_\_\_\_hours**

**35. Had anybody from your relatives (mother, sister, aunt etc.) have preeclampsia (high blood pressure) during pregnancy?**

1. Yes a. specify\_\_\_\_\_
2. No
88. Don't know

**36. Have you been pregnant before that pregnancy? (Include all pregnancies that ended in life births, spontaneous or induced abortions, ectopic pregnancy and stillbirth as well)**

1. Yes
2. No (finish)

**37. Indicate all earlier pregnancies started from the first one, including all pregnancies that ended in life births, spontaneous or induced abortions, ectopic pregnancies and stillbirths as well. State the date/year the pregnancy ended and the gestational weeks of their termination. State whether or not you had preeclampsia (high BP) during that pregnancy.**

| N | Date/year of outcome | Life birth | Spontaneous abortion (<22 weeks) | Induced abortion (<22 weeks) | Ectopic pregnancy | Stillbirths (>22 weeks) | Gestational weeks at termination | Preeclampsia (High BP during pregnancy) |
|---|----------------------|------------|----------------------------------|------------------------------|-------------------|-------------------------|----------------------------------|-----------------------------------------|
| 1 |                      |            |                                  |                              |                   |                         |                                  |                                         |
| 2 |                      |            |                                  |                              |                   |                         |                                  |                                         |
| 3 |                      |            |                                  |                              |                   |                         |                                  |                                         |
| 4 |                      |            |                                  |                              |                   |                         |                                  |                                         |
| 5 |                      |            |                                  |                              |                   |                         |                                  |                                         |
| 6 |                      |            |                                  |                              |                   |                         |                                  |                                         |
| 7 |                      |            |                                  |                              |                   |                         |                                  |                                         |

**38. Were all your mentioned pregnancies from the same man?**

1. Yes (Finish)
2. No
3. Refuse to respond

**39. Have you had other pregnancy from the father of the baby born in \_\_\_\_/\_\_\_\_/\_\_\_\_ .  
(Day) (Month)(Year)**

1. Yes
2. No
3. Refuse to respond

**Thank you!**
